# Supplementary material for: Drug-induced sleep endoscopy compared with systematic adenotonsillectomy in the management of obstructive sleep apnoea in children: a systematic review and meta-analysis protocol
Source: PubMed Central journal article supplement — BMJ Open. 2019 Sep 11;9(9):e028242. doi: 10.1136/bmjopen-2018-028242 (PMC6738734; doi:10.1136/bmjopen-2018-028242), 2019-09-11
Supplement: bmjopen-2018-028242supp002.pdf [file bmjopen-2018-028242supp002.pdf]

## Appendix B – Sample search strategy (MEDLINE)

Database: OVID Medline Epub Ahead of Print, In-Process & Other Non-Indexed Citations, Ovid MEDLINE(R) Daily and Ovid MEDLINE(R) 1946 to Present  
Search Strategy:

- 
- 1 sleep apnea syndromes/ or exp sleep apnea, obstructive/ (29977)
  - 2 (obstruct\* adj2 hypopn?ea\*).mp. [mp=title, abstract, original title, name of substance word, subject heading word, keyword heading word, protocol supplementary concept word, rare disease supplementary concept word, unique identifier, synonyms] (438)
  - 3 apn?e\*-hypopn\*.mp. (8934)
  - 4 (nocturnal adj2 hypoxemia).mp. (411)
  - 5 apn?eic.mp. (3195)
  - 6 (upper airway adj3 (resistan\* or obstruct\*)).mp. [mp=title, abstract, original title, name of substance word, subject heading word, keyword heading word, protocol supplementary concept word, rare disease supplementary concept word, unique identifier, synonyms] (5042)
  - 7 (sleep\* adj3 (apne\* or apnoe\* or hypopn\* or obstruct\* or disorder\* or disturb\*)).mp. (75865)
  - 8 (osa or osas or osahs).tw. (15457)
  - 9 ((apn?e\* or hypopn?ea) adj1 index).mp. (7834)
  - 10 (airway adj1 (resistan\* or obstruct\* or collapsib\*)).mp. (42933)
  - 11 or/1-10 (118935)
  - 12 \*ENDOSCOPY/ (26578)
  - 13 DISE.mp. (224)
  - 14 ((sleep or sedation) and (endoscop\* or nas?endoscop\*)).mp. (4384)
  - 15 or/12-14 (30540)
  - 16 11 and 15 (1237)
  - 17 Pediatrics/ or adolescent/ or child/ or child, preschool/ or exp infant/ (3295505)
  - 18 (child\* or children or pediat\* or paediat\* or infan\* or youth\* or toddler\* or adolesc\* or teen\* or boy or boys or boyfriend or boyhood or girl\* or preschool\* or pre-school\* or minors or minors\* or kid or kids or schoolchild\* or adolescen\* or juvenil\* or youth\* or teen\* or under\*age\* or pubescen).mp. [mp=title, abstract, original title, name of substance word, subject heading word, keyword heading word, protocol supplementary concept word, rare disease supplementary concept word, unique identifier, synonyms] (3818207)
  - 19 school child\*.ti,ab. (21272)
  - 20 (Infan\* or newborn\* or new-born\* or perinat\* or neonat\* or baby or baby\* or babies or toddler\*).mp. [mp=title, abstract, original title, name of substance word, subject heading word, keyword heading word, protocol supplementary concept word, rare disease supplementary concept word, unique identifier, synonyms] (1425311)
  - 21 or/17-20 (4018110)
  - 22 11 and 15 and 21 (398)
